# Supplementary material
Source: Royal Society of Chemistry journal article supplement (doi:10.1039/d6nr00242k)
Supplement: d6nr00242k1.pdf [file d6nr00242k1.pdf]

## Supplementary Information

### **Synergistic Cobalt-MOF@rGO Nanocomposites for High-Performance Supercapacitors and Electrochemical Detection of Cd<sup>2+</sup> ions**

Ajay Kumar,<sup>1,a,b,c</sup> Jaiveer Singh,<sup>1,a</sup> Arushi Sharma,<sup>a</sup> Subhas C. Sahoo,<sup>a</sup> S.K. Mehta,<sup>a</sup> Vinod Kumar,<sup>d</sup> Oussama-El-Kadri<sup>b,c,e</sup>, Shweta Rana<sup>\*a</sup> and Ramesh Kataria<sup>\*a</sup>

<sup>a</sup>*Department of Chemistry and Centre for Advanced Studies in Chemistry, Panjab University, Chandigarh-160 014, India*

<sup>b</sup>*Department of Biology, Chemistry, and Environmental Sciences, American University of Sharjah, POB 26666, Sharjah, United Arab Emirates*

<sup>c</sup>*Materials Research Center, College of Arts and Sciences, American University of Sharjah, 26666, Sharjah, United Arab Emirates*

<sup>e</sup>*Materials Science and Engineering PhD Program, College of Arts and Sciences, American University of Sharjah, 26666, Sharjah, United Arab Emirates*

<sup>d</sup>*Department of Chemistry, Central University of Haryana, Mahendragarh-123031*

<sup>1</sup>*Co-first authors*

**\*Email:** [rkataria@pu.ac.in](mailto:rkataria@pu.ac.in); [shweta0402@gmail.com](mailto:shweta0402@gmail.com)

**Content:**

| S.No.                | Figures                                                                                                                                                                         |
|----------------------|---------------------------------------------------------------------------------------------------------------------------------------------------------------------------------|
| <b>Section S1</b>    | Experimental section                                                                                                                                                            |
| <b>Figure S1</b>     | FTIR spectra of NADP                                                                                                                                                            |
| <b>Figure S2</b>     | FTIR spectra of ligand (L <sub>1</sub> )                                                                                                                                        |
| <b>Figure S2 (a)</b> | Spherical void created by the paddlewheel SBUs in wireframe and                                                                                                                 |
| <b>Figure S2 (b)</b> | (b) space-filled form.                                                                                                                                                          |
| <b>Figure S4</b>     | FESEM mapping and EDS results of PUC6@rGO.                                                                                                                                      |
| <b>Figure S5</b>     | (a) Current (i)/[scan rate (v)] <sup>1/2</sup> vs [scan rate(v) <sup>1/2</sup> ] plot and (b) scan rate (v) vs charge contribution (%) for PUC6@rGO based supercapacitor device |
| <b>Figure S6</b>     | Nyquist plots for PUC6@rGO based symmetric supercapacitor device.                                                                                                               |
| <b>Figure S7</b>     | Nyquist plots for PUC6@rGO based symmetric supercapacitor device before and after GCD cycles.                                                                                   |
| <b>Figure S8</b>     | Galvanostatic charge-discharge (GCD) profiles                                                                                                                                   |
| <b>Figure S9</b>     | Bode plot for PUC6@rGO based symmetric supercapacitor device                                                                                                                    |
| <b>Table S1</b>      | Crystallographic parameters of PUC6                                                                                                                                             |
| <b>Table S2 (a)</b>  | Bond angles for PUC6                                                                                                                                                            |
| <b>Table S2 (b)</b>  | Bond distance for PUC6                                                                                                                                                          |

**S1. Experimental Section****S1.1 Reagents**

NADP was purchased from TCI Chemicals. Cobalt nitrate hexahydrate (Co(NO<sub>3</sub>)<sub>2</sub>·6H<sub>2</sub>O), methanol, dimethylacetamide, acetic acid, graphene oxide, concentrated sulfuric acid (H<sub>2</sub>SO<sub>4</sub>), sodium nitrate (NaNO<sub>3</sub>), hydrogen peroxide (H<sub>2</sub>O<sub>2</sub>), sodium carbonate (Na<sub>2</sub>CO<sub>3</sub>), sodium borohydride (NaBH<sub>4</sub>), and potassium hydroxide (KOH) were obtained from Sigma-Aldrich. All reagents were of analytical grade and used without further purification. Solutions were prepared using triple-distilled water throughout the experiments.

**S1.2 Instrumentation**

Powder X-ray diffraction (PXRD) analysis was performed using a PANalyticalX'Pert PRO diffractometer equipped with Cu K $\alpha$  radiation to examine the crystalline structure of the samples. Raman spectra were recorded on a Horiba Jobin Yvon LABRAM HR spectrometer. X-ray photoelectron spectroscopy (XPS) measurements were carried out using a PHI 5000 VersaProbe III instrument to investigate surface chemical composition and elemental states. Surface morphology and elemental distribution of the composite were analyzed using a field-emission scanning electron microscope (FE-SEM, Hitachi SU8010) coupled with energy-

dispersive X-ray (EDX) spectroscopy. Electrochemical measurements were conducted using a Metrohm AUTOLAB PGSTAT20 N electrochemical workstation controlled by NOVA 2.1.4 software. A conventional three-electrode configuration was employed, in which the synthesized composite served as the working electrode, Ag/AgCl acted as the reference electrode, and a platinum wire was used as the counter electrode.

### **S1.3 Single-Crystal X-ray Diffraction Data Collection and Structure Determination**

High-quality single crystals suitable for X-ray diffraction were obtained by slow crystallization from a solvent system comprising DMF. A selected crystal of PUC-6 was mounted on a Hampton cryoloop and analyzed using a SuperNova single-crystal X-ray diffractometer equipped with a microfocused sealed Mo X-ray tube (Mo-K $\alpha$  radiation,  $\lambda = 0.71073 \text{ \AA}$ ) and a HyPix3000 area detector. Intensity data were collected through  $\omega$ -scan measurements with an incremental step size of  $0.3^\circ$  per frame and an exposure time of 10 s per frame.

Data acquisition, integration, and reduction were performed using the CrysAlisPro software package, while structure visualisation and further processing were carried out with Olex2. The initial crystal structure solution was achieved by direct methods using the SIR2004 program, followed by full-matrix least-squares refinement employing the SHELXL refinement suite<sup>2,3</sup>. All non-hydrogen atoms were refined anisotropically.

The presence of highly disordered lattice solvent molecules (DMF and water) resulted in diffuse electron density that could not be reliably modelled. Consequently, the solvent contribution-corresponding to two DMF and three water molecules per unit cell was treated using the solvent masking procedure implemented in Olex2. As a result, the reported molecular composition of the coordination framework may show minor deviations from the actual formulation.

The crystallographic data for this structure, excluding structure factors, have been deposited with the Cambridge Crystallographic Data Centre (CCDC) under deposition number 2467429. Complete crystallographic information files (CIFs) can be obtained free of charge from the CCDC, Cambridge, United Kingdom.

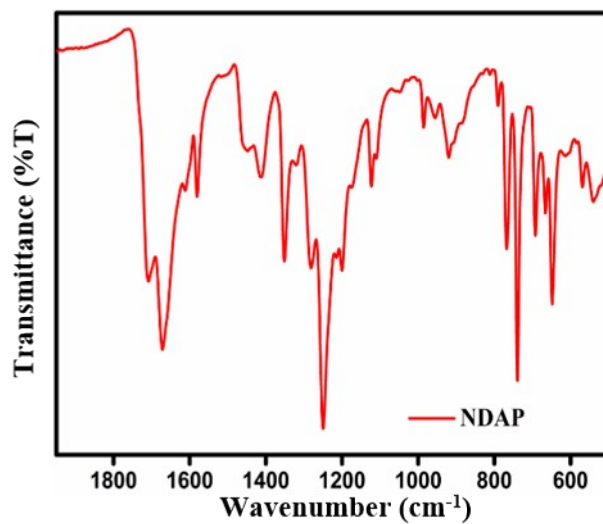

**Figure S1.**FTIR spectra of NADP

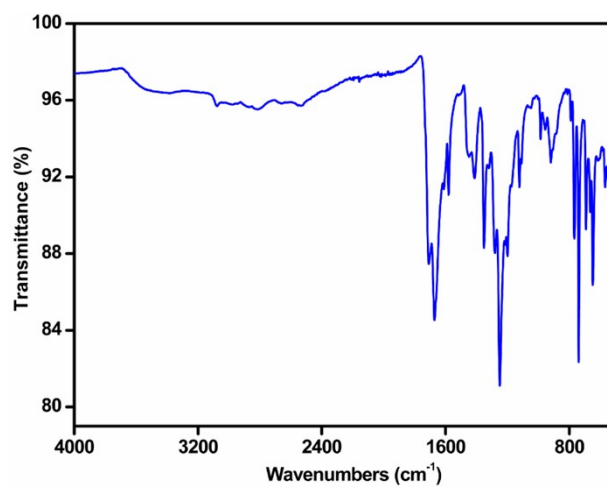

**Figure S2.**FTIR spectra of ligand (L<sub>1</sub>)

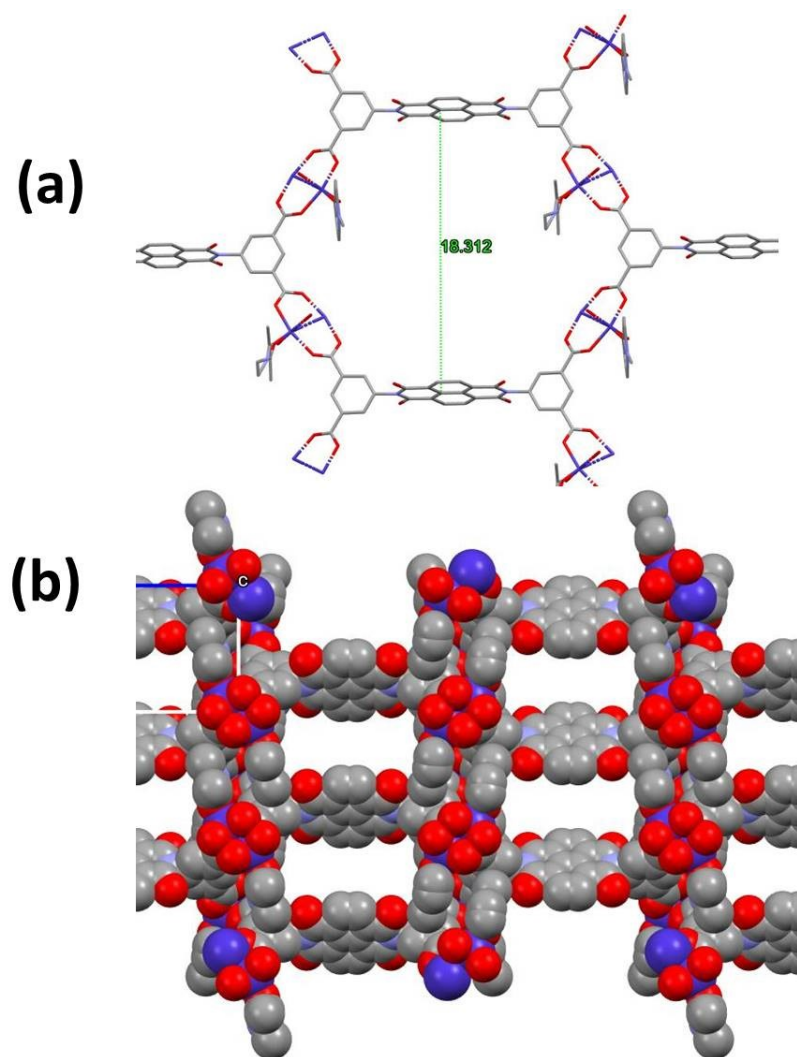

**Figure S3.** (a) Spherical void created by the paddlewheel SBUs in wireframe and (b) space-filled form

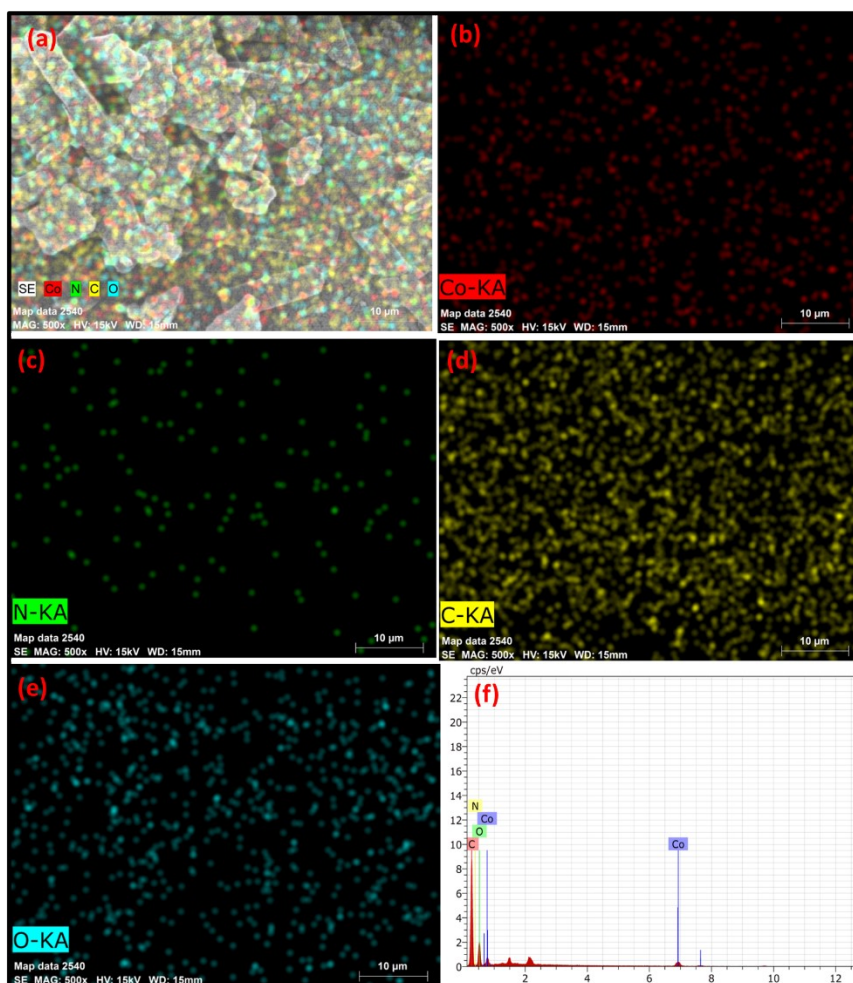

Figure S4. FESEM mapping and EDS results of PUC6@rGO

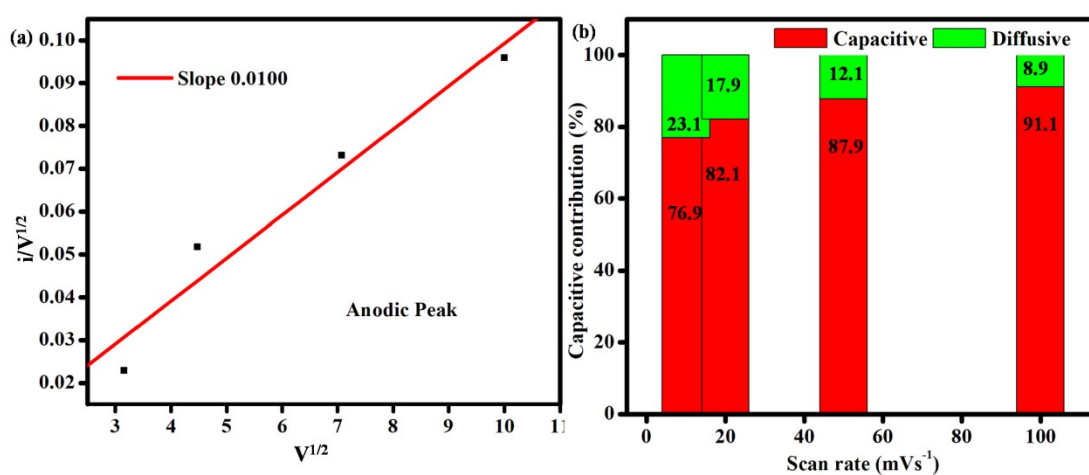

Figure S5. (a) Current ( $i$ )/[scan rate ( $v$ )]<sup>1/2</sup> vs [scan rate( $v$ )]<sup>1/2</sup> plot and (b) scan rate ( $v$ ) vs charge contribution (%) for PUC6@rGO based supercapacitor device.

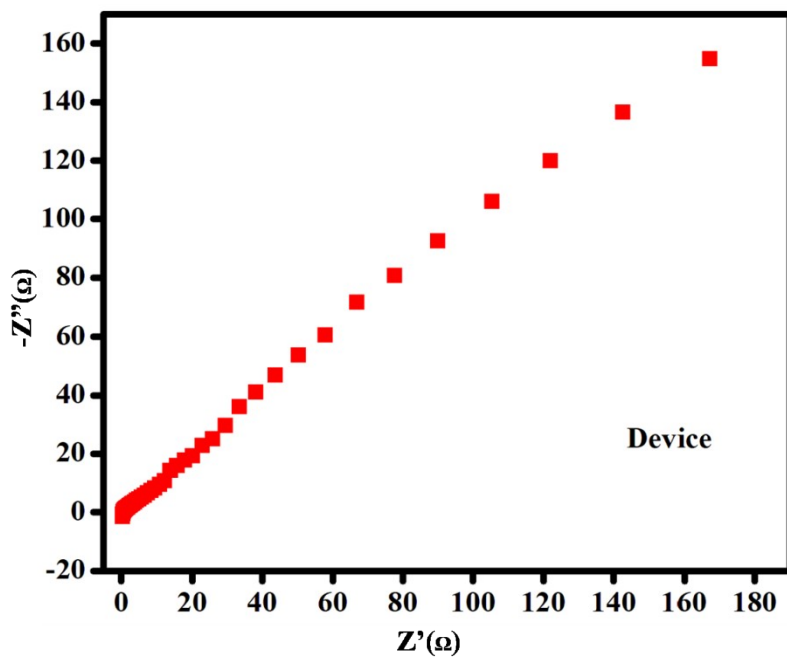

Figure S6 Nyquist plots for PUC6@rGO based symmetric supercapacitor device.

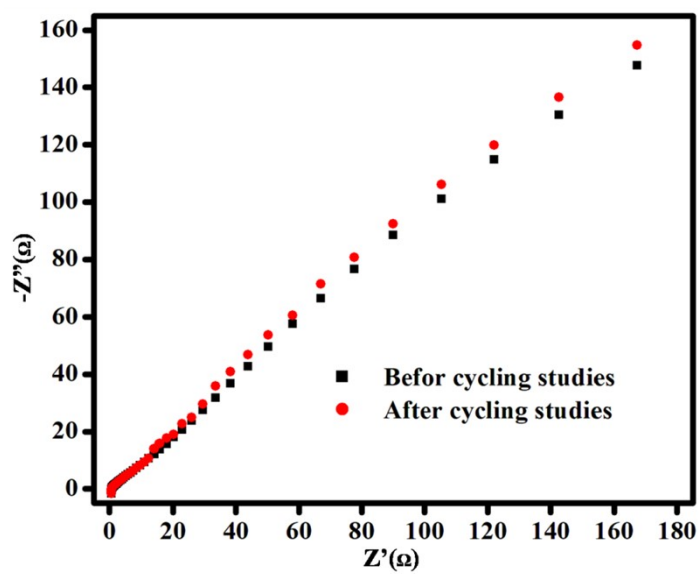

Figure S7 Nyquist plots for PUC6@rGO based symmetric supercapacitor device before and after GCD cycles.

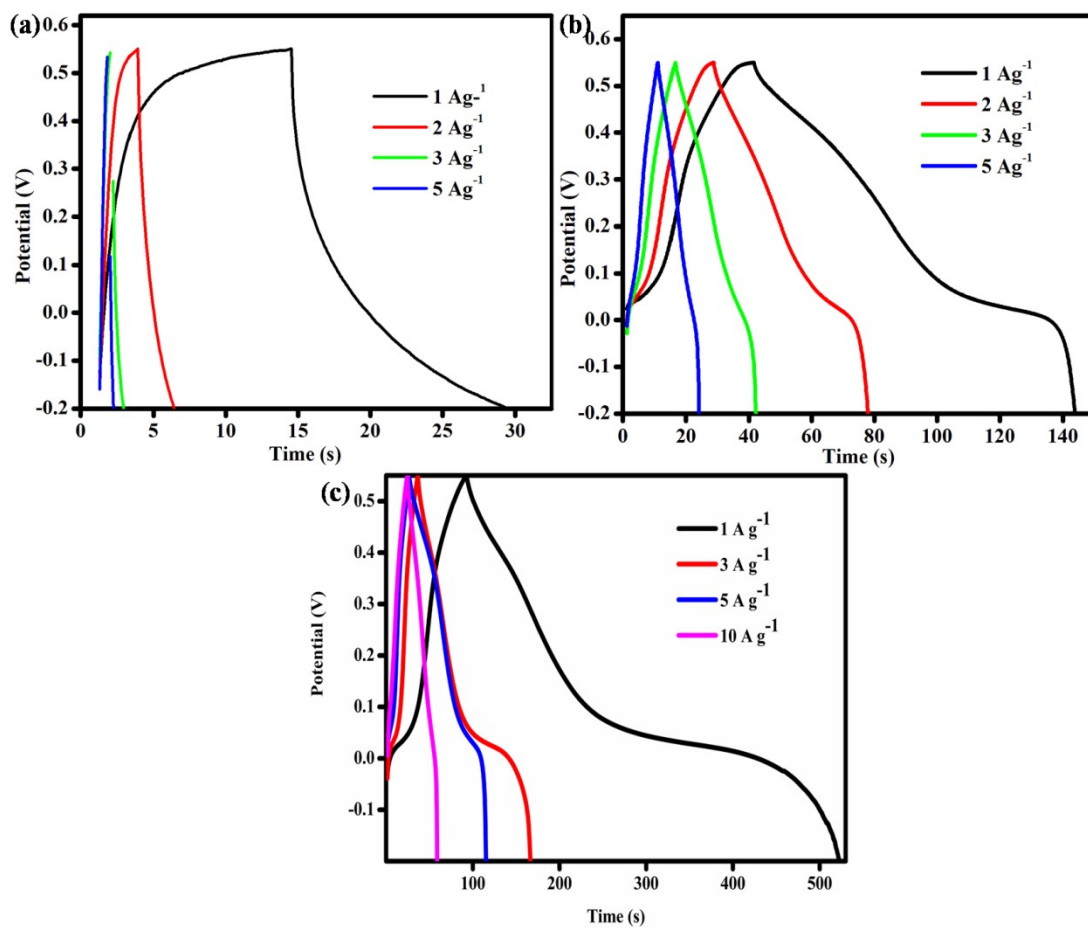

**Figure S8.** Galvanostatic charge-discharge (GCD) profiles for (a) PUC6, (b) rGO and (c) PUC6@rGO at a current density of 1 A g<sup>-1</sup>; (d) GCD curves of PUC6@rGO at various current densities ranging from 1 to 5 A g<sup>-1</sup>.

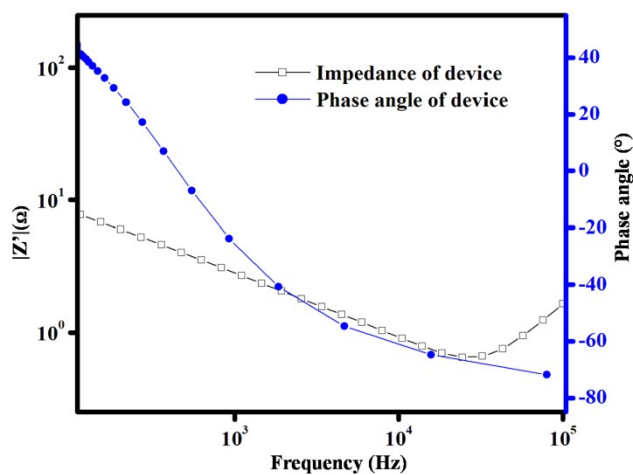

**Figure S9.** Bode plot for PUC6@rGO based symmetric supercapacitor device.

**Table S1:** Crystallographic parameters of PUC6

| Identification code                   | PUC6                                                                               |
|---------------------------------------|------------------------------------------------------------------------------------|
| CCDC                                  | 2467429                                                                            |
| Empirical formula                     | C <sub>18.75</sub> H <sub>5.90</sub> C <sub>04</sub> N <sub>2</sub> O <sub>7</sub> |
| M <sub>r</sub> [g mol <sup>-1</sup> ] | 430.08                                                                             |
| T (K)                                 | 293(2)                                                                             |
| wavelength (Å <sup>o</sup> )          | 0.71073                                                                            |
| crystal system                        | Monoclinic                                                                         |
| space group                           | <i>I</i> 2/ <i>m</i>                                                               |
| <i>a</i> [Å]                          | 10.5576(6)                                                                         |
| <i>b</i> [Å]                          | 14.9621(9)                                                                         |
| <i>c</i> [Å]                          | 36.9093(13)                                                                        |
| $\alpha$ [deg]                        | 90                                                                                 |
| $\beta$ [deg]                         | 90.034(5)                                                                          |
| $\gamma$ [deg]                        | 90                                                                                 |
| <i>V</i> [Å <sup>3</sup> ]            | 5830.3(5)                                                                          |
| <i>Z</i>                              | 8                                                                                  |
| $\rho_{calc}$ [g cm <sup>-3</sup> ]   | 0.980                                                                              |
| $\mu$ [mm <sup>-1</sup> ]             | 0.617                                                                              |
| <i>F</i> (000)                        | 1727                                                                               |
| crystal size [mm] <sup>3</sup>        | 0.12 × 0.008 × 0.005                                                               |
| reflection collected                  | 13769                                                                              |
| independent reflections               | 5317                                                                               |
| GOF on <i>F</i> <sup>2</sup>          | 1.096                                                                              |
| final R indices (R1/wR2) [I > 2σ(I)]  | 0.1176/<br>0.3074                                                                  |
| R indices (R1/wR2) all data           | 0.2086/<br>0.3704                                                                  |

**Table S2 (a):** Bond angles for PUC6

| Atom            | Atom | Atom            | Angle/ <sup>o</sup> | Atom             | Atom | Atom | Angle/ <sup>o</sup> |
|-----------------|------|-----------------|---------------------|------------------|------|------|---------------------|
| O3 <sup>1</sup> | Co1  | O3 <sup>2</sup> | 88.4(3)             | C14              | C12  | C11  | 121.0(9)            |
| O4 <sup>3</sup> | Co1  | O3 <sup>1</sup> | 160.9(3)            | C14              | C12  | C13  | 120.0(10)           |
| O4 <sup>3</sup> | Co1  | O3 <sup>2</sup> | 88.3(3)             | C11 <sup>7</sup> | C11  | C12  | 120.1(11)           |
| O4              | Co1  | O3 <sup>1</sup> | 88.3(3)             | C10              | C11  | C12  | 120.4(8)            |
| O4              | Co1  | O3 <sup>2</sup> | 160.9(3)            | C9               | C10  | C11  | 119.0(10)           |
| O4 <sup>3</sup> | Co1  | O4              | 88.6(4)             | C15 <sup>7</sup> | C10  | C11  | 121.0(8)            |
| O7              | Co1  | O3 <sup>2</sup> | 96.1(3)             | C15 <sup>7</sup> | C10  | C9   | 120.0(9)            |
| O7              | Co1  | O3 <sup>1</sup> | 96.1(3)             | O6               | C13  | N1   | 121.4(9)            |
| O7              | Co1  | O4              | 103.0(3)            | C12              | C13  | N1   | 118.0(9)            |
| O7              | Co1  | O4 <sup>3</sup> | 103.0(3)            | C12              | C13  | O6   | 120.6(11)           |
| O2 <sup>4</sup> | Co2  | O2 <sup>5</sup> | 87.7(3)             | O5               | C9   | N1   | 119.8(8)            |
| O1              | Co2  | O2 <sup>5</sup> | 89.2(2)             | C10              | C9   | N1   | 119.6(10)           |
| O1              | Co2  | O2 <sup>4</sup> | 160.4(3)            | C10              | C9   | O5   | 120.6(10)           |

|                  |     |                  |           |                   |      |                   |           |
|------------------|-----|------------------|-----------|-------------------|------|-------------------|-----------|
| O1 <sup>6</sup>  | Co2 | O2 <sup>5</sup>  | 160.4(3)  | C15               | C14  | C12               | 119.2(11) |
| O16              | Co2 | O2 <sup>4</sup>  | 89.2(2)   | C14               | C15  | C10 <sup>7</sup>  | 119.2(11) |
| O16              | Co2 | O1               | 87.1(4)   | C16               | N2   | C17               | 156.0(10) |
| O8               | Co2 | O2 <sup>5</sup>  | 96.4(3)   | C16 <sup>3</sup>  | N2   | C17               | 156.0(10) |
| O8               | Co2 | O2 <sup>4</sup>  | 96.4(3)   | C16 <sup>3</sup>  | N2   | C16               | 48(2)     |
| O8               | Co2 | O1               | 103.1(3)  | C18 <sup>3</sup>  | N2   | C17               | 96.8(12)  |
| O8               | Co2 | O1 <sup>6</sup>  | 103.1(3)  | C18               | N2   | C17               | 96.8(12)  |
| C8               | O3  | Co1              | 134.7(6)  | C18               | N2   | C16 <sup>3</sup>  | 59.1(14)  |
| C1               | O2  | Co2              | 134.3(7)  | C18 <sup>3</sup>  | N2   | C16 <sup>3</sup>  | 107.1(18) |
| C1               | O1  | Co2              | 118.1(6)  | C18 <sup>3</sup>  | N2   | C16               | 59.1(14)  |
| C8               | O4  | Co1              | 117.3(6)  | C18               | N2   | C16               | 107.1(18) |
| C19 <sup>6</sup> | O8  | Co2              | 151.8(10) | C18               | N2   | C18 <sup>3</sup>  | 166(3)    |
| C19              | O8  | Co2              | 151.8(10) | C19               | N3   | C19 <sup>6</sup>  | 45.0(18)  |
| C19              | O8  | C19 <sup>6</sup> | 43.4(17)  | C21 <sup>6</sup>  | N3   | C19               | 136.6(16) |
| C16              | O7  | Co1              | 148.7(10) | C21               | N3   | C19 <sup>6</sup>  | 136.6(16) |
| C16 <sup>3</sup> | O7  | Co1              | 148.7(10) | C21 <sup>6</sup>  | N3   | C19 <sup>6</sup>  | 164(3)    |
| C16 <sup>3</sup> | O7  | C16              | 46.5(18)  | C21               | N3   | C19               | 164(3)    |
| C2               | C3  | C4               | 121.9(6)  | C21 <sup>6</sup>  | N3   | C21               | 36(2)     |
| C13              | N1  | C6               | 117.0(7)  | C18               | C18A | C16 <sup>3</sup>  | 76(4)     |
| C9               | N1  | C6               | 119.0(8)  | N2                | C16  | O7                | 132.1(17) |
| C9               | N1  | C13              | 124.1(7)  | C18A              | C16  | O7                | 110(2)    |
| C5               | C4  | C3               | 117.7(7)  | C18A              | C16  | N2                | 117(2)    |
| C8               | C4  | C3               | 121.0(7)  | C16 <sup>3</sup>  | C16  | O7                | 66.7(9)   |
| C8               | C4  | C5               | 121.2(7)  | C16 <sup>3</sup>  | C16  | N2                | 66.0(10)  |
| C1               | C2  | C3               | 121.5(7)  | C16 <sup>3</sup>  | C16  | C18A              | 175.3(19) |
| C7               | C2  | C3               | 118.7(7)  | C18 <sup>3</sup>  | C16  | O7                | 145(2)    |
| C7               | C2  | C1               | 119.7(7)  | C18 <sup>3</sup>  | C16  | N2                | 82(2)     |
| C6               | C5  | C4               | 119.5(7)  | C18 <sup>3</sup>  | C16  | C18A <sup>3</sup> | 35.5(16)  |
| C5               | C6  | N1               | 118.0(7)  | N3 <sup>6</sup>   | C19  | O8 <sup>6</sup>   | 135.3(16) |
| C7               | C6  | N1               | 119.2(7)  | C20A <sup>6</sup> | C19  | O8 <sup>6</sup>   | 122.9(19) |
| C7               | C6  | C5               | 122.8(7)  | C20A <sup>6</sup> | C19  | N3 <sup>6</sup>   | 101.1(17) |
| O4               | C8  | O3               | 126.5(8)  | C19 <sup>6</sup>  | C19  | O8 <sup>6</sup>   | 68.3(9)   |
| C4               | C8  | O3               | 117.0(8)  | C19 <sup>6</sup>  | C19  | N3 <sup>6</sup>   | 67.5(9)   |
| C4               | C8  | O4               | 116.3(8)  | C19 <sup>6</sup>  | C19  | C20A <sup>6</sup> | 168.6(14) |
| O1               | C1  | O2               | 126.9(8)  | C18A              | C18  | N2 <sup>3</sup>   | 107(4)    |
| C2               | C1  | O2               | 114.6(9)  | C16 <sup>3</sup>  | C18  | N2 <sup>3</sup>   | 38.9(13)  |
| C2               | C1  | O1               | 118.5(8)  | C16 <sup>3</sup>  | C18  | C18A              | 68(3)     |
| C6               | C7  | C2               | 119.0(7)  | C21 <sup>6</sup>  | C21  | N3                | 72.2(12)  |
| C13              | C12 | C11              | 118.9(9)  |                   |      |                   |           |

**Table S2 (b):** Bond distance for PUC6

| Atom | Atom             | Length (Å) | Atom | Atom             | Length (Å) |
|------|------------------|------------|------|------------------|------------|
| Co1  | Co1 <sup>1</sup> | 2.915(3)   | C5   | C6               | 1.368(11)  |
| Co1  | O3 <sup>1</sup>  | 2.045(5)   | C6   | C7               | 1.344(11)  |
| Co1  | O3 <sup>2</sup>  | 2.045(5)   | O5   | C9               | 1.263(12)  |
| Co1  | O4               | 2.008(6)   | O6   | C13              | 1.221(13)  |
| Co1  | O4 <sup>3</sup>  | 2.008(6)   | C12  | C11              | 1.387(14)  |
| Co1  | O7               | 1.983(10)  | C12  | C13              | 1.495(12)  |
| Co2  | Co2 <sup>4</sup> | 2.909(3)   | C12  | C14              | 1.428(15)  |
| Co2  | O2 <sup>5</sup>  | 2.051(5)   | C11  | C11 <sup>7</sup> | 1.396(15)  |
| Co2  | O2 <sup>4</sup>  | 2.051(5)   | C11  | C10              | 1.397(13)  |
| Co2  | O1               | 2.007(6)   | C10  | C9               | 1.472(11)  |
| Co2  | O1 <sup>6</sup>  | 2.007(6)   | C10  | C15 <sup>7</sup> | 1.427(16)  |
| Co2  | O8               | 1.990(9)   | C14  | C15              | 1.389(13)  |
| O3   | C8               | 1.247(10)  | N2   | C17              | 1.42(3)    |
| O2   | C1               | 1.257(11)  | N2   | C16              | 1.15(2)    |
| O1   | C1               | 1.234(11)  | N2   | C16 <sup>3</sup> | 1.15(2)    |
| O4   | C8               | 1.273(11)  | N2   | C18 <sup>3</sup> | 1.81(4)    |
| O8   | C19 <sup>6</sup> | 1.157(19)  | N2   | C18              | 1.81(4)    |
| O8   | C19              | 1.157(19)  | N3   | C19 <sup>6</sup> | 1.12(2)    |
| O7   | C16              | 1.19(2)    | N3   | C19              | 1.12(2)    |
| O7   | C16 <sup>3</sup> | 1.19(2)    | N3   | C21 <sup>6</sup> | 1.56(4)    |
| C3   | C4               | 1.400(10)  | N3   | C21              | 1.56(4)    |
| C3   | C2               | 1.366(11)  | C20A | C19 <sup>6</sup> | 1.48(3)    |
| N1   | C6               | 1.470(8)   | C18A | C16 <sup>3</sup> | 1.50(4)    |
| N1   | C13              | 1.359(12)  | C18A | C18              | 0.94(4)    |
| N1   | C9               | 1.326(13)  | C16  | C16 <sup>3</sup> | 0.94(4)    |
| C4   | C5               | 1.392(9)   | C16  | C18 <sup>3</sup> | 1.57(4)    |
| C4   | C8               | 1.475(11)  | C19  | C19 <sup>6</sup> | 0.86(3)    |
| C2   | C1               | 1.497(11)  | C21  | C21 <sup>6</sup> | 0.95(5)    |
| C2   | C7               | 1.411 (9)  |      |                  |            |

**References:**

1. M. C. Burla, R. Caliendo, M. Camalli, B. Carrozzini, G. L. Cascarano, C. Giacovazzo, M. Mallamo, A. Mazzone, G. Polidori and R. Spagna, *J. Appl. Crystallogr.*, 2012, 45, 357–361.
2. G. M. Sheldrick, *Acta Crystallogr., Sect. C: Struct. Chem.*, 2015, 71, 3–8.
3. O. V. Dolomanov, L. J. Bourhis, R. J. Gildea, J. A. K. Howard and H. Puschmann, *J. Appl. Crystallogr.*, 2009, 42, 339–341.
